# Supplementary material for: Immune-related gene signature predicts overall survival of gastric cancer patients with varying microsatellite instability status
Source: publisher site journal article supplement (doi:10.18632/aging.202271), 2020-12-09
Supplement: Supplementary file [file aging-v13i2-202271-supplementary-material-SD1.pdf]

## SUPPLEMENTARY FIGURES

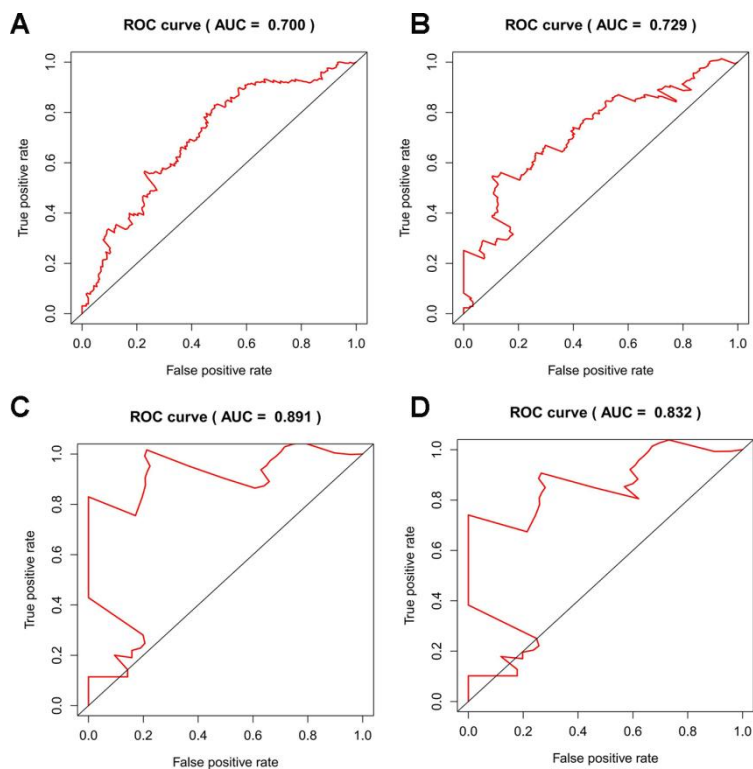

**Supplementary Figure 1. The ROC curves for predicting OS by the risk score. (A, B)** The AUC values of 3 and 5 year survival of the prognostic model in MSI-L/MSS patients. **(C, D)** The AUC values of 3 and 5 year survival of the prognostic model in MSI-H samples.

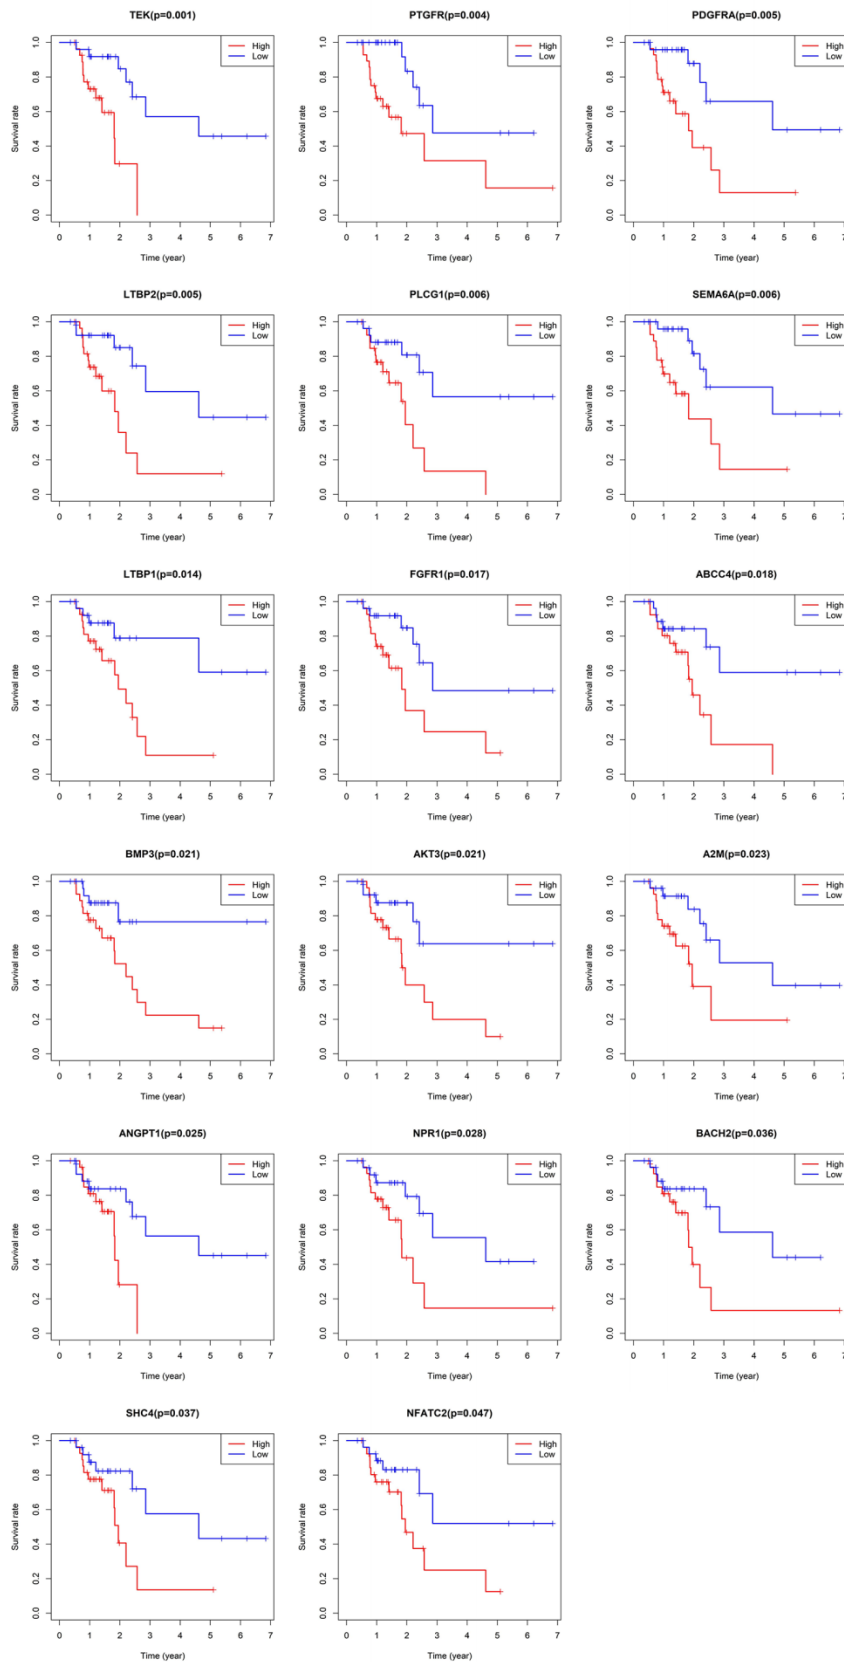

**Supplementary Figure 2. Kaplan–Meier survival curves for identical immune genes associated with OS of MSI-H samples both in Kaplan-Meier survival and univariate regression.**
